# Supplementary material for: How to Predict Cancer-Specific Death of Patients with Chondrosarcoma: A Prognostic Model Based on Competing Risk
Source: Research Square preprint supplement (doi:10.21203/rs.3.rs-851215/v1), 2021-09-20
Supplement: Supplementary file 1 [file 0cee2fa96e8b7d1a0ade485d.xlsx]

## Sheet: Sheet1
Table3. C-index, AUC, and Brier Score to Assess the Performance of the Model
	C-index	AUC		Brier Score
		3-y Prediction	5-y Prediction	3-y Prediction	5-y Prediction
Training cohort	0.801	0.878	0.845	8.3	10.3
Validation cohort	0.807	0.858	0.853	9.5	11.3
