# Supplementary material for: How to Predict Cancer-Specific Death of Patients with Chondrosarcoma: A Prognostic Model Based on Competing Risk
Source: Research Square preprint supplement (doi:10.21203/rs.3.rs-851215/v1), 2021-09-20
Supplement: Supplementary file 2 [file 7173cf15361cfbb722d23df4.xlsx]

## Sheet: Sheet1
TABLE 1. Characteristic of 1674 Patients With CHS
Characteristics	Category	Total N=1674	Tiaining Cohort N=795	Validation Cohort N=879
Age, years	Mean (SD)	51.9 (16.9)	51.3 (16.7)	52.5 (17.1)
	>=52	873 (52.2%)	406 (51.1%)	484 (55.0%)
	<52	801 (47.8%)	389 (48.9%)	395 (44.9%)
Race	Black	119 (7.1%)	55 (6.9%)	64 (7.3%)
	White	1470 (87.8%)	705 (88.7%)	765 (87.0%)
	Other	85 (5.1%)	35 (4.4%)	50 (5.7%)
Sex	Female	733 (43.8%)	358 (45.0%)	375 (42.7%)
	Male	941 (56.2%)	437 (55.0%)	504 (57.3%)
Grade	Low grade	1308 (78.1%)	629 (79.1%)	679 (77.2%)
	Hige grade	366 (21.9%)	166 (20.9%)	200 (22.8%)
Size, mm	Mean (SD)	83.7 (68.8)	83.7 (67.3)	83.7 (70.3)
	>=83.7	629 (37.6%)	300 (37.7%)	329 (37.4%)
	<83.7	1045 (62.4%)	495 (62.3%)	550 (62.6%)
Range	Localized	881 (52.6%)	374 (47.0%)	507 (57.7%)
	Regional involvement	645 (38.5%)	348 (43.8%)	297 (33.8%)
	Distant metastasis	148 (8.8%)	73 (9.2%)	75 (8.5%)
Surgery	No surgery	124 (7.4%)	55 (6.9%)	69 (7.8%)
	Tumor excision	348 (20.8%)	168 (21.1%)	180 (20.5%)
	Radical resection	996 (59.5%)	467 (58.7%)	529 (60.2%)
	Amputation	206 (12.3%)	105 (13.2%)	101 (11.5%)
Outcome	Alive	1260 (75.3%)	554 (69.7%)	706 (80.3%)
	Dead of CHS	320 (19.1%)	179 (22.5%)	141 (16.0%)
	Dead of other causes	94 (5.6%)	62 (7.8%)	32 (3.6%)
Subtype	Conventional CHS	1331 (79.5%)	633 (79.6%)	698 (79.4%)
	Myxoid CHS	202 (12.1%)	109 (13.7%)	93 (10.6%)
	Dedifferentiated CHS	141 (8.4%)	53 (6.7%)	88 (10.0%)
CHS: chondrosarcoma. SD: standard deviation. Other races include American Indian/AK Native, Asian/Pacific Islander. Low grade indicates well differentiated and moderately differentiated, high grade indicates poorly differentiated and undifferentiated.
