# Supplementary material for: How to Predict Cancer-Specific Death of Patients with Chondrosarcoma: A Prognostic Model Based on Competing Risk
Source: Research Square preprint supplement (doi:10.21203/rs.3.rs-851215/v1), 2021-09-20
Supplement: Supplementary file 3 [file 9d908e61fcdbf63b6a85a7f7.xlsx]

## Sheet: Sheet1
TABLE 2. Multivariate Analysis by the Cox and Fine-Gray Regression Methods for the Outcome
Characteristics		Cox		Fine-Gray		β-coefficient
		HR(95%CI)	P	SHR(95%CI)	P
Age		1.02 (1.01-1.03)	<0.001	1.02 (1.01-1.03)	<0.001	0.021
Sex	Female	Reference		Reference
	Male	1.32 (0.96-1.82)	0.091	1.26 (0.89-1.78)	0.19
Race	Black	Reference		Reference
	White	0.63 (0.22-1.83)	0.4	1.02 (0.49-2.12)	0.97
	Other	1.07 (0.54-2.10)	0.855	0.61 (0.19-1.93)	0.4
Grade	Low grade	Reference		Reference
	Hige grade	0.39 (0.28-0.55)	<0.001	2.60 (1.83-3.68)	<0.001	1.054
Size		1.00 (0.99-1.00)	0.209	1.001 (1.000-1.003)	0.25
Stage	Localized	Reference		Reference
	Regional involvement	0.09 (0.06-0.15)	<0.001	3.15 (2.01-4.93)	<0.001	1.208
	Distant metastasis	0.30 (0.21-0.43)	<0.001	11.56 (6.82-19.59)	<0.001	2.63
Surgery treatment	No surgery	Reference		Reference
	Tumor excision	1.48 (0.84-2.59)	0.174	0.47 (0.25-0.87)	0.02	-0.944
	Radical resection	0.66 (0.45-0.96)	0.031	0.54 (0.32-0.90)	0.02	-0.778
	Amputation	0.61 (0.35-1.05)	0.074	0.85 (0.49-1.50)	0.58	-0.219
Subtype	Conventional CHS	Reference		Reference
	Myxoid CHS	1.32 (0.89-1.96)	0.171	1.34 (0.91-1.97)	0.14	0.311
	Dedifferentiated CHS	2.15 (1.38-3.36)	<0.001	2.16 (1.30-3.59)	0.003	0.75
CHS indicates chondrosarcoma. β-coefficient is from the competing risk based prognostic model. Other races include American Indian/AK Native, Asian/Pacific Islander. Low grade indicates well differentiated and moderately differentiated, high grade indicates poorly differentiated and undifferentiated. Age and Size were analyzed as continuous variable.
